# Supplementary material for: It Takes a Hui: Evaluating Outcomes of Family Hui, a Peer-led Parenting Program
Source: Springer Nature journal article supplement (doi:10.1007/s10826-023-02580-6), 2023-06-08
Supplement: MOESM2 [file 25466228]

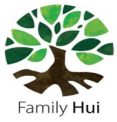

# Family Hui Pre Survey Version 2

Date: \_\_\_/\_\_\_/\_\_\_

1. **Race/Ethnicity.** What is your race/ethnicity?  
*Please check all that apply.*

- African American
- American-Indian/Alaska Native
- Asian
- Hispanic/Latino
- Native Hawaiian/Pacific Islander
- White (non-Latino)
- Other: \_\_\_\_\_

3. **Education.** What is your highest level of education? *Please check one answer.*

- Grade 12 or less, no high school diploma
- High school diploma or GED
- Some college
- AA/AS degree or vocational school
- BA/BS degree
- Graduate school
- Other: \_\_\_\_\_

2. **Language.** What language do you primarily speak at home? *Please check one answer.*

- |         |                          |         |
|---------|--------------------------|---------|
| English | <input type="checkbox"/> | Russian |
| Spanish | <input type="checkbox"/> | Hmong   |
| Farsi   | <input type="checkbox"/> | Dari    |
| Arabic  | <input type="checkbox"/> | Pashto  |
| Other:  | _____                    |         |

4. **Child's Age.** What is your child's birthday?  
*Please fill in birth date for each child.*

|         | month | / | day   | / | year  |
|---------|-------|---|-------|---|-------|
| Child 1 | /     |   | /     |   |       |
| Child 2 | _____ | / | _____ | / | _____ |
| Child 3 | _____ | / | _____ | / | _____ |
| Child 4 | _____ | / | _____ | / | _____ |
| Child 5 | _____ | / | _____ | / | _____ |
|         | _____ |   | _____ |   | _____ |

5. Please check the box that most closely fits your response:

|                                                                                                            | All of the time          | Most of the time         | Some of the time         | None of the time         | Don't know               |
|------------------------------------------------------------------------------------------------------------|--------------------------|--------------------------|--------------------------|--------------------------|--------------------------|
| <b>Development.</b> How often do you play games with your child like singing songs or reading books?       | <input type="checkbox"/> |
| <b>Social/Emotional.</b> How often are you able to soothe your child when he/she is upset?                 | <input type="checkbox"/> |
| <b>Resilience.</b> How often are you able to adapt when changes occur?                                     | <input type="checkbox"/> |
| <b>Social Connections.</b> How often is someone available who understands your problems?                   | <input type="checkbox"/> |
| <b>Support.</b> How often is someone available to give you information to help you understand a situation? | <input type="checkbox"/> |

6. **Expectations.** What do you hope to gain from participating in this program?

7. **Challenges.** What are the greatest challenges or barriers you face as a parent or caregiver that you would like addressed in this program?

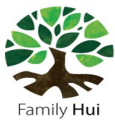

**Family Hui Post Participation Survey**  
Version 2

Date: \_\_\_\_/\_\_\_\_/\_\_\_\_

Location: \_\_\_\_\_

**Thank you for taking the time to complete the following survey.** The information you provide will be used to help improve services for children and their families.

1. **Race/Ethnicity.** What is your race/ethnicity?  
*Please check all that apply.*

- African American
- American-Indian/Alaska Native
- Asian
- Hispanic/Latino
- Native Hawaiian/Pacific Islander
- White (non-Latino)
- Other: \_\_\_\_\_

2. **Location:** What is your zip code?

\_\_\_\_\_

3. **Education.** What is your highest level of education? *Please check one answer.*

- Grade 12 or less, no high school diploma
- High school diploma or GED
- Some college
- AA/AS degree or vocational school
- BA/BS degree
- Graduate school
- Other: \_\_\_\_\_

4. **Language.** What language do you primarily speak at home? *Please check one answer.*

- English
- Spanish
- Farsi
- Arabic
- Russian
- Hmong
- Dari
- Pashto
- Other: \_\_\_\_\_

5. **Child's Age.** What is your child's birthday?  
*Please fill in birth date for each child.*

*month / day / year*

- Child 1                    /                    /
- Child 2    \_\_\_\_\_ / \_\_\_\_\_ / \_\_\_\_\_
- Child 3                    /                    /
- Child 4                    /                    /
- Child 5                    /                    /

6. **Participation:** Including today, how many times did you participate in this Family Hui? *Please check one answer.*

- 1-2 times
- 3-6 times
- 7-10 times
- 11-12 times

7. **Please indicate how much you agree with the following statements.** *Please check one answer per row.*

| Since participating in the Family Hui program...                                                                            | Agree                    | Somewhat Agree           | Somewhat Disagree        | Disagree                 | Don't know               |
|-----------------------------------------------------------------------------------------------------------------------------|--------------------------|--------------------------|--------------------------|--------------------------|--------------------------|
| a. I have an understanding of how children develop                                                                          | <input type="checkbox"/> |
| b. I have an understanding of how adverse childhood experiences (ACEs) can impact brain development, health, and parenting. | <input type="checkbox"/> |
| c. I have an understanding of what skills or behaviors are appropriate for my child's age.                                  | <input type="checkbox"/> |
| d. I feel connected with other families.                                                                                    | <input type="checkbox"/> |
| e. I had an opportunity to connect with services and resources when needed.                                                 | <input type="checkbox"/> |
| f. I am confident as a parent.                                                                                              | <input type="checkbox"/> |

**Family Hui Program Post Participation Survey**    Last name: \_\_\_\_\_

| Since participating in the Family Hui program...                                               | Agree                    | Somewhat Agree           | Somewhat Disagree        | Disagree                 | Don't know               |
|------------------------------------------------------------------------------------------------|--------------------------|--------------------------|--------------------------|--------------------------|--------------------------|
| g. I can manage the stresses of raising a child.                                               | <input type="checkbox"/> |
| h. I am able to enjoy my relationship(s) with my child(ren) and family.                        | <input type="checkbox"/> |
| i. When my child is upset, I can identify the problem and potential solutions.                 | <input type="checkbox"/> |
| j. Art of Parenting Activities helped me understand myself and my relationship with my family. | <input type="checkbox"/> |

8. Please indicate how much you agree with the following statements. Please check one answer per row.

|                                                                                                   | Agree                    | Somewhat Agree           | Somewhat Disagree        | Disagree                 | Don't know               |
|---------------------------------------------------------------------------------------------------|--------------------------|--------------------------|--------------------------|--------------------------|--------------------------|
| a. The <i>Family Hui</i> program was respectful of my culture.                                    | <input type="checkbox"/> |
| b. The <i>Family Hui</i> group leader communicated with me in a language I feel comfortable with. | <input type="checkbox"/> |
| c. I trusted the <i>Family Hui</i> group leader.                                                  | <input type="checkbox"/> |
| d. The <i>Family Hui</i> program location made it easy for me to participate.                     | <input type="checkbox"/> |
| e. My ideas were welcomed and I felt included in the <i>Family Hui</i> program.                   | <input type="checkbox"/> |
| f. The <i>Family Hui</i> program hours made it easy for me to participate.                        | <input type="checkbox"/> |
| g. I would recommend the <i>Family Hui</i> program to a family member or friend.                  | <input type="checkbox"/> |

9. How has participating in the *Family Hui* program benefitted you/your family?

10. Is there anything that you would you change about the *Family Hui* program?

11. Is there anything else you would like to add?
